# Supplementary material for: Pregnancy-Induced Changes in microRNA Expression in Multiple Sclerosis
Source: Front Immunol. 2021 Jan 28;11:552101. doi: 10.3389/fimmu.2020.552101 (PMC7876450; doi:10.3389/fimmu.2020.552101)
Supplement: Supplementary file 3 [file Table_1.xlsx]

## Sheet: Supp Table 1
Supplementary Table 1
microRNA	S: 50RT/150 real-time PCR rxn. Part number	ABI Assay ID	Mature sequence
hsa-miR-486-5p	4427975	1278	UCCUGUACUGAGCUGCCCCGAG
hsa-miR-19b-1*	4427975	2425	AGUUUUGCAGGUUUGCAUCCAGC
hsa-miR-95	4427975	433	UUCAACGGGUAUUUAUUGAGCA
hsa-miR-221	4427975	524	AGCUACAUUGUCUGCUGGGUUUC
hsa-miR-1	4427975	2222	UGGAAUGUAAAGAAGUAUGUAU
hsa-miR-20a	4427975	580	UAAAGUGCUUAUAGUGCAGGUAG
hsa-miR-31*	4427975	2113	UGCUAUGCCAACAUAUUGCCAU
hsa-miR-28-5p	4427975	411	AAGGAGCUCACAGUCUAUUGAG
hsa-miR-340*	4427975	2259	UCCGUCUCAGUUACUUUAUAGC
hsa-miR-186	4427975	2285	CAAAGAAUUCUCCUUUUGGGCU
hsa-miR-17	4427975	2308	CAAAGUGCUUACAGUGCAGGUAG
hsa-miR-922	4427975	2152	GCAGCAGAGAAUAGGACUACGUC
hsa-miR-200b	4427975	2251	UAAUACUGCCUGGUAAUGAUGA
hsa-miR-106a	4427975	2169	AAAAGUGCUUACAGUGCAGGUAG
hsa-miR-22*	4427975	2301	AGUUCUUCAGUGGCAAGCUUUA
hsa-miR-20b	4427975	1014	CAAAGUGCUCAUAGUGCAGGUAG
hsa-miR-625	4427975	2431	AGGGGGAAAGUUCUAUAGUCC
hsa-miR-146a	4427975	468	UGAGAACUGAAUUCCAUGGGUU
hsa-miR-335	4427975	546	UCAAGAGCAAUAACGAAAAAUGU
hsa-miR-342-5p	4427975	2147	AGGGGUGCUAUCUGUGAUUGA
hsa-miR-874	4427975	2268	CUGCCCUGGCCCGAGGGACCGA
miR-330-3p	4427975	544	GCAAAGCACACGGCCUGCAGAGA
miR-196b	4427975	2215	UAGGUAGUUUCCUGUUGUUGGG
